## Correction

# Correction: Proteasome subunit- $\alpha$ type-6 protein is post-transcriptionally repressed by the microRNA-4490 in diabetic nephropathy

Ying Feng, Ming-yue Jin, Dong-wei Liu and Li Wei

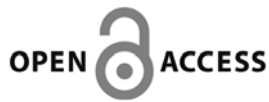

*Bioscience Reports* (2018) 38, BSR20180815; <https://doi.org/10.1042/BSR20180815>

The forenames and surnames of the second and third authors were transposed in the published version of this article. The correct names, Ming-yue Jin and Dong-wei Liu, are presented here. The online version was corrected on 20 December 2018.

Version of Record published:  
11 January 2019
